# Supplementary material for: Embryonic type Na+ channel β-subunit, SCN3B masks the disease phenotype of Brugada syndrome
Source: Sci Rep. 2016 Sep 28;6:34198. doi: 10.1038/srep34198 (PMC5039759; doi:10.1038/srep34198)
Supplement: Supplementary Information [file srep34198-s1.pdf]

## Supplementary Information

### Embryonic type Na<sup>+</sup> channel $\beta$ -subunit, *SCN3B* masks the disease phenotype of Brugada syndrome

Shinichiro Okata<sup>1,2</sup>, MD, PhD, Shinsuke Yuasa\*<sup>1</sup>, MD, PhD, Tomoyuki Suzuki<sup>1,3</sup>, MD, PhD, Shogo Ito<sup>1</sup>, MD, Naomasa Makita<sup>4</sup>, MD, PhD, Tetsu Yoshida<sup>5</sup>, PhD, Min Lin<sup>2</sup>, PhD, Junko Kurokawa<sup>2</sup>, PhD, Tomohisa Seki<sup>1</sup>, MD, PhD, Toru Egashira<sup>1</sup>, MD, PhD, Yoshiyasu Aizawa<sup>1</sup>, MD, PhD, Masaki Kodaira<sup>1</sup>, MD, PhD, Chikaaki Motoda<sup>1</sup>, MD, Gakuto Yozu<sup>1</sup>, MD, Masaya Shimojima<sup>1</sup>, MD, Nozomi Hayashiji<sup>1</sup>, PhD, Hisayuki Hashimoto<sup>1</sup>, MD, PhD, Yusuke Kuroda<sup>1,3</sup>, MD, Atsushi Tanaka<sup>1</sup>, MD, PhD, Mitsushige Murata<sup>1,6</sup>, MD, PhD, Takeshi Aiba<sup>7</sup>, MD, PhD, Wataru Shimizu<sup>8</sup>, MD, PhD, Minoru Horie<sup>9</sup>, MD, PhD, Kaichiro Kamiya<sup>3</sup>, MD, PhD, Tetsushi Furukawa<sup>2</sup>, MD, PhD, Keiichi Fukuda<sup>1</sup>, MD, PhD

1: Department of Cardiology, Keio University School of Medicine, Japan.

2: Department of Bio-informational Pharmacology, Medical Research Institute, Tokyo Medical and Dental University, Japan.

3: Department of Cardiovascular Research, Research Institute of Environmental Medicine, Nagoya University, Japan.

4: Department of Molecular Pathophysiology-1, Nagasaki University Graduate School of Biomedical Sciences, Nagasaki, Japan.

5: Division of Gene Therapy, Research Center of Genome Medicine, Saitama Medical University, Japan.

6: Department of Laboratory Medicine, Keio University School of Medicine, Tokyo, Japan.

7: Division of Arrhythmia and Electrophysiology, Department of Cardiovascular Medicine, National Cerebral and Cardiovascular Center, Osaka, Japan.

8: Department of Cardiovascular Medicine, Nippon Medical School, Tokyo, Japan.

9: Department of Cardiovascular Medicine, Shiga University of Medical Science, Shiga, Japan.

**Supplementary Figure 1. Differentiation ability of LQTS3/BrS iPSCs**

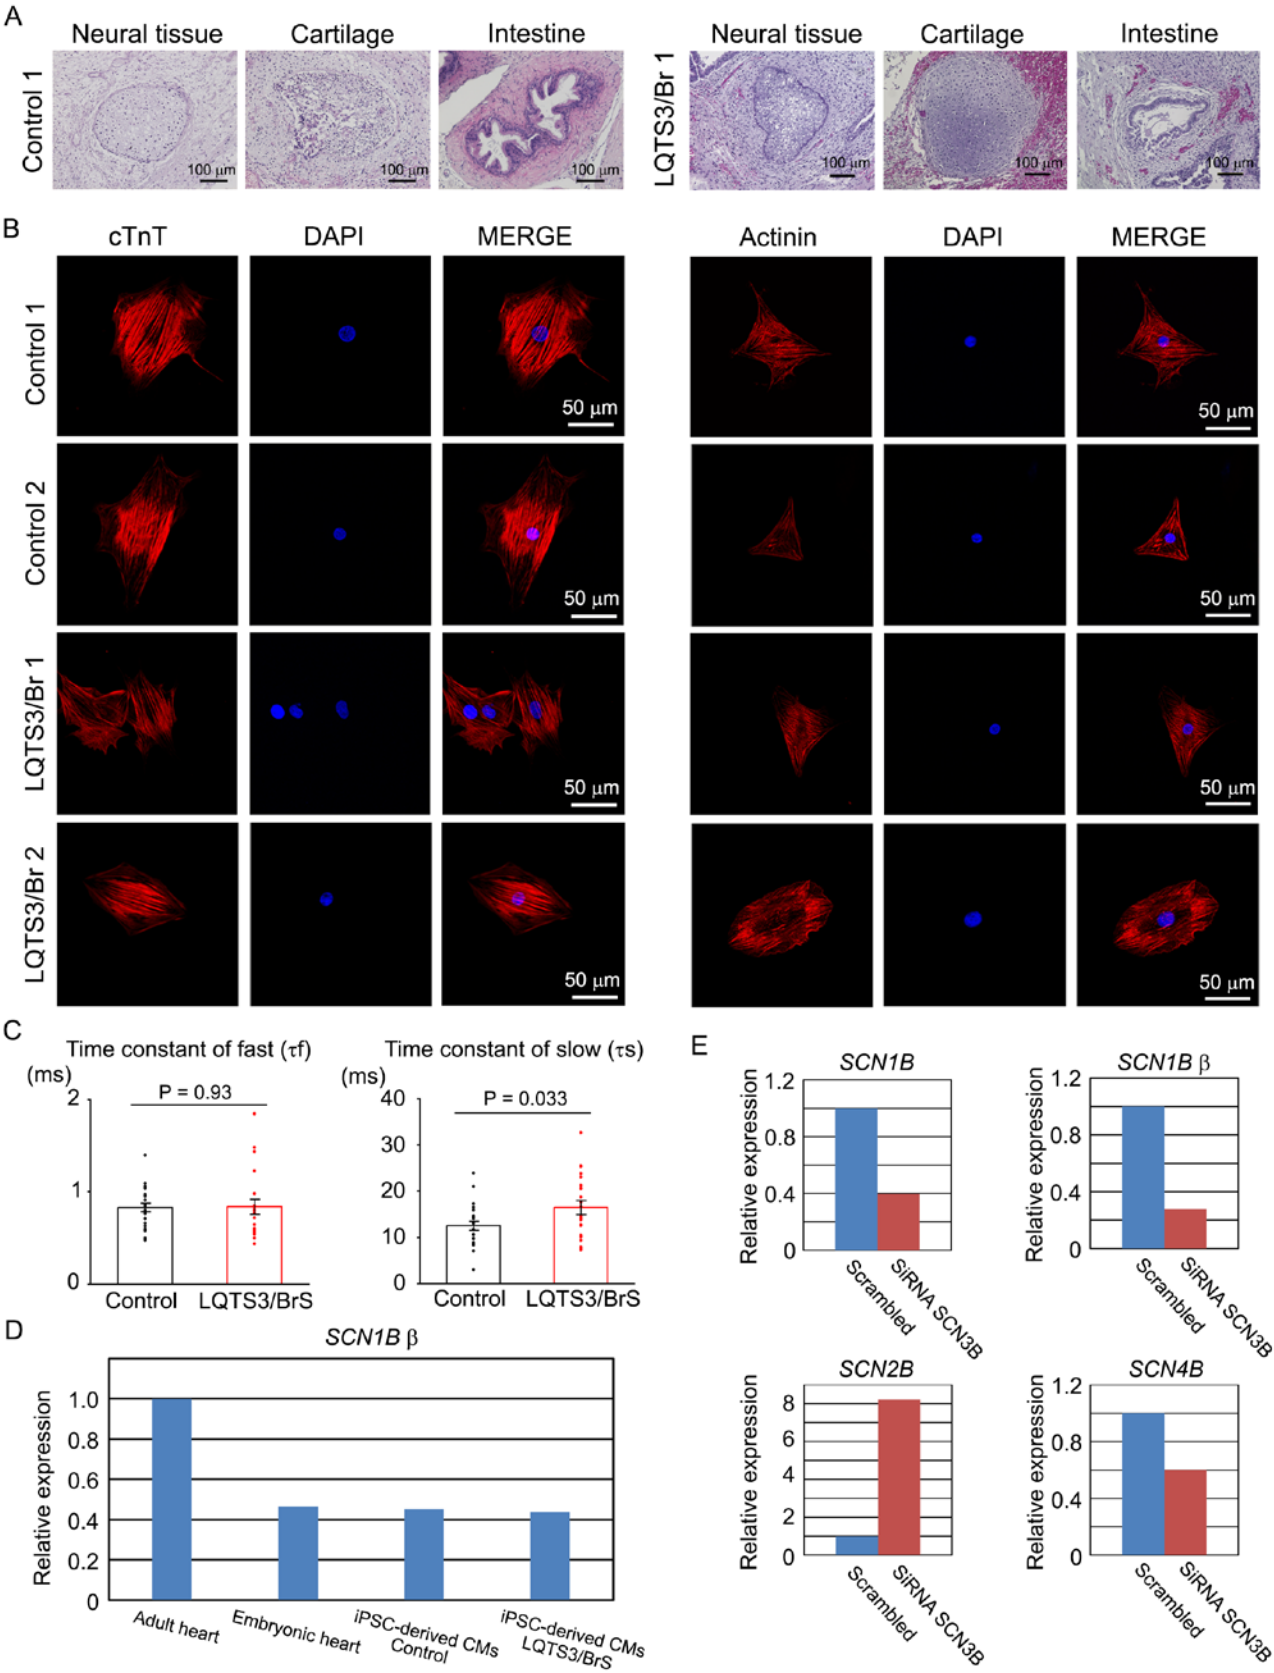

**A.** Teratoma formation following injection of LQTS3/BrS-iPSCs in immune-compromised NOD-SCID mice. Sections of teratomas were stained with hematoxylin and eosin, and tissues representative of all three germ layers were observed. Scale bars, 100  $\mu$ m. **B.** Immunofluorescence staining for cardiomyocyte markers (cardiac troponin T [cTnT] and actinin) in two control and two LQTS3/BrS iPSC-derived cardiomyocytes. DAPI, 4',6'-diamidino-2-phenylindole. **C.** Time constants of current decay of NaI current in control- and LQTS3/BrS-iPSC-derived cardiomyocytes, measured by macropatch. Current decay at each potential was fit with a biexponential function; time constants of fast ( $\tau_f$ ) and slow ( $\tau_s$ ) components are shown. **D.** Quantitative RT-PCR analyses for *SCN1B* $\beta$  in adult human heart (mixed sample from three men aged 30–39 years), embryonic heart (mixed human sample from 34 male and female embryos at 12–31 weeks gestation), control-iPSC-derived-cardiomyocytes and LQTS3/BrS-iPSC-derived cardiomyocytes. **E.** Quantitative RT-PCR analyses of *SCN1B*, *SCN1B* $\beta$ , *SCN2B* and *SCN4B* in iPSC-derived cardiomyocytes transfected with either scrambled siRNA or siRNA for *SCN3B*.

**Supplementary Figure 2. Electrophysiological features of corrected-LQTS3/BrS iPSC-derived cardiomyocytes**

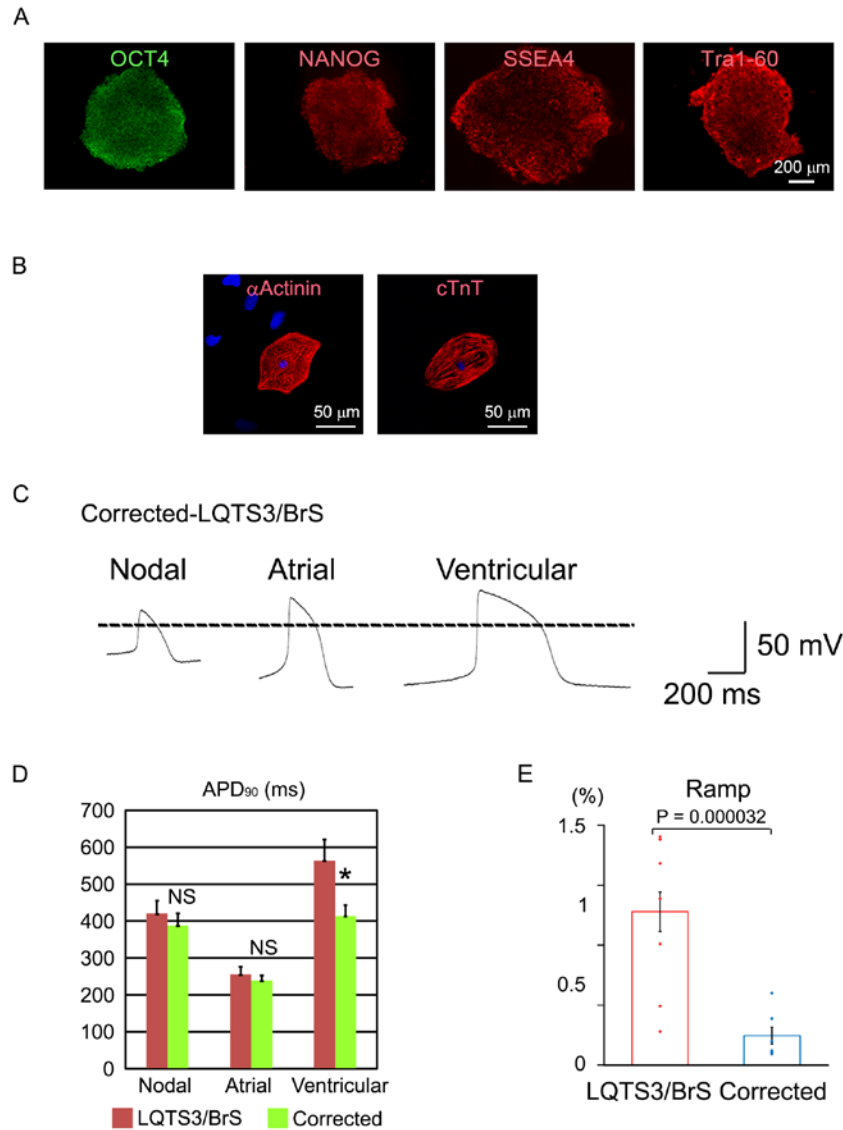

**A.** Immunofluorescence staining for stem cell markers (OCT4, NANOG, SSEA4 and Tra1-60) in corrected-LQTS3/BrS iPSC colonies. **B.** Immunofluorescence staining for cardiomyocyte markers ( $\alpha$ Actinin and cardiac troponin T [cTnT]) in corrected-LQTS3/BrS iPSC-derived cardiomyocytes. **C.** Representative action potentials of corrected-LQTS3/BrS iPSC-derived cardiomyocytes showing nodal-, atrial- and ventricular-type morphology. The dashed line indicate 0 mV. **D.** Statistical parameters of action potential duration at 90% repolarization (APD<sub>90</sub>) obtained from LQTS3/BrS and corrected-LQTS3/BrS iPSC-derived cardiomyocytes exhibiting nodal- (n = 19 and 11, respectively), atrial- (n = 4 and 8, respectively) and ventricular-type (n = 7 and 10, respectively) morphology. Where appropriate, data are given as the mean  $\pm$  SEM. \*P < 0.05 compared with control. **E.** The peak of ramp currents normalized to the peak current recorded in the same cell in LQTS3/BrS (n = 13) and corrected-LQTS3/BrS iPSC-derived cardiomyocytes (n = 9).

**Supplementary Table. Electrophysiological characteristics of iPSC-derived cardiomyocytes**

**Nodal type-iPSC-derived cardiomyocytes:**

|                             | Maximum<br>upstroke<br>velocity (V/S) | APD 50 (ms)  | APD 90 (ms)    | Over<br>shoot<br>(mv) | Amplitude<br>(mv) | Resting<br>potential<br>(mV) | n  |
|-----------------------------|---------------------------------------|--------------|----------------|-----------------------|-------------------|------------------------------|----|
| control                     | 2.9 ± 0.8                             | 134.1 ± 20.7 | 354.5 ± 53.3   | 19.7 ± 2.7            | 56.2 ± 4.9        | -36.5 ± 2.9                  | 6  |
| LQTS3/BrS                   | 3.0 ± 2.4                             | 174.0 ± 19.7 | 419.9 ± 30.7   | 23.9 ± 1.6            | 63.2 ± 3.2        | -39.3 ± 2.1                  | 19 |
| corrected                   | 2.8 ± 0.7                             | 153.7 ± 22.2 | 355.8 ± 33.5   | 25.7 ± 3.3            | 61.2 ± 4.7        | -35.4 ± 2.1                  | 11 |
| <b>p value (Bonferroni)</b> |                                       |              |                |                       |                   |                              |    |
|                             | Maximum<br>upstroke<br>velocity (V/S) | APD 50 (ms)  | APD 90<br>(ms) | Over shoot<br>(mv)    | Amplitude<br>(mv) | Resting<br>potential<br>(mV) |    |
| control vs.<br>LQTS3/BrS    | 1                                     | 0.72363      | 0.98081        | 1                     | 0.89955000        | 1                            |    |
| control vs.<br>corrected    | 1                                     | 1            | 1              | 0.71073               | 1.00000000        | 1                            |    |
| LQTS3/BrS<br>vs. corrected  | 1                                     | 1            | 0.70985        | 1                     | 1                 | 0.70199                      |    |

**Atrial type-iPSC-derived cardiomyocytes:**

|                             | Maximum<br>upstroke<br>velocity (V/S) | APD 50 (ms)    | APD 90 (ms)    | Over shoot<br>(mv) | Amplitude<br>(mv) | Resting<br>potential<br>(mV) | n |
|-----------------------------|---------------------------------------|----------------|----------------|--------------------|-------------------|------------------------------|---|
| control                     | 39.1 ± 12.8                           | 108.8 ± 12.4   | 237.4 ± 16.4   | 28.3 ± 3.6         | 98.3 ± 2.4        | -69.9 ± 5.6                  | 6 |
| LQTS3/BrS                   | 10.0 ± 2.6                            | 127.9 ± 7.2    | 255.0 ± 21.0   | 30.1 ± 0.8         | 89.0 ± 1.4        | -59.0 ± 1.6                  | 4 |
| corrected                   | 7.6 ± 1.1                             | 141.2 ± 16.8   | 244.3 ± 14.3   | 34.3 ± 2.3         | 89.8 ± 3.8        | -55.4 ± 1.1                  | 8 |
| <b>p value (Bonferroni)</b> |                                       |                |                |                    |                   |                              |   |
|                             | Maximum<br>upstroke<br>velocity (V/S) | APD 50<br>(ms) | APD 90<br>(ms) | Over shoot<br>(mv) | Amplitude<br>(mv) | Resting<br>potential (mV)    |   |
| control vs.<br>LQTS3/BrS    | 0.08107                               | 1              | 1              | 1                  | 0.18203000        | 0.17821                      |   |
| control vs.<br>corrected    | 0.01928                               | 0.38954        | 1              | 0.36988            | 0.12422000        | 0.01703                      |   |
| LQTS3/BrS<br>vs. corrected  | 1                                     | 1              | 1              | 0.96459            | 1                 | 1                            |   |

**Ventricular type-LQT3/BrS-iPSC-derived cardiomyocytes:**

|                                    | Maximum<br>upstroke<br>velocity (V/S) | APD 50 (ms)         | APD 90 (ms)         | Over<br>shoot<br>(mv) | Amplitude<br>(mv) | Resting<br>potential<br>(mV) | n         |
|------------------------------------|---------------------------------------|---------------------|---------------------|-----------------------|-------------------|------------------------------|-----------|
| <b>control</b>                     | <b>15.8 ± 3.8</b>                     | <b>247.3 ± 30.5</b> | <b>416.7 ± 24.0</b> | <b>34.4 ± 2.5</b>     | <b>99.3 ± 3.9</b> | <b>-65.0 ± 4.0</b>           | <b>10</b> |
| <b>LQTS3/BrS</b>                   | <b>21.8 ± 10.8</b>                    | <b>326.1 ± 74.5</b> | <b>563.7 ± 57.1</b> | <b>37.4 ± 1.8</b>     | <b>97.4 ± 4.0</b> | <b>-60.0 ± 2.8</b>           | <b>7</b>  |
| <b>corrected</b>                   | <b>8.6 ± 1.6</b>                      | <b>250.9 ± 40.0</b> | <b>418.0 ± 29.6</b> | <b>39.3 ± 1.2</b>     | <b>93.1 ± 2.9</b> | <b>-53.8 ± 1.9</b>           | <b>10</b> |
| <b>p value (Bonferroni)</b>        |                                       |                     |                     |                       |                   |                              |           |
|                                    | Maximum<br>upstroke<br>velocity (V/S) | APD<br>50 (ms)      | APD 90<br>(ms)      | Over shoot<br>(mv)    | Amplitude<br>(mv) | Resting<br>potential<br>(mV) |           |
| <b>control vs.<br/>LQTS3/BrS</b>   | <b>1</b>                              | <b>0.7474</b>       | <b>0.02809</b>      | <b>1</b>              | <b>1.00000000</b> | <b>0.88136</b>               |           |
| <b>control vs.<br/>corrected</b>   | <b>1</b>                              | <b>1</b>            | <b>1</b>            | <b>0.31901</b>        | <b>0.62100000</b> | <b>0.04073</b>               |           |
| <b>LQTS3/BrS<br/>vs. corrected</b> | <b>0.34571</b>                        | <b>0.8129<br/>3</b> | <b>0.02979</b>      | <b>1</b>              | <b>1</b>          | <b>0.57432</b>               |           |
